# Supplementary material for: 2018–2022 Southern Resident killer whale presence in the Salish Sea: continued shifts in habitat usage
Source: PeerJ. 2023 Jul 12;11:e15635. doi: 10.7717/peerj.15635 (PMC10349564; doi:10.7717/peerj.15635)
Supplement: Data S1 [file peerj-11-15635-s001.xlsx]

## Sheet: Figure 2
	Winter	Spring	Summer	Fall
CSS	101	72	233	107
PS	16	3	16	133
NSS	14	8	9	20

## Sheet: Figures 4 + 5
From Olson et al. 2018 Figures S3 and S4
	1998	1999	2000	2001	2002		Average
Jan	9	2	11	14	18		10.8
Feb	11	6	7	17	5		9.2
Mar	8	2	12	10	8		8
Apr	11	13	14	27	12		15.4
May	27	22	20	25	24		23.6
Jun	30	30	29	29	30		29.6
Jul	28	31	24	24	27		26.8
Aug	25	29	10	26	20		22
Sep	30	22	17	23	24		23.2
Oct	20	5	10	10	6		10.2
Nov	15	20	8	13	8		12.8
Dec	8	11	21	4	9		10.6
	2018	2019	2020	2021	2022		Average		2022 Speculated
Jan	4	11	8	4	10		7.4		26
Feb	1	4	6	6	11		5.6		18
Mar	7	8	12	13	15		11		31
Apr	5	11	6	7	11		8		14
May	0	4	0	0	8		2.4		9
Jun	12	0	2	0	11		5		11
Jul	20	2	21	5	14		12.4		14
Aug	10	17	0	4	9		8		10
Sep	29	20	22	20	19		22		20
Oct	7	17	13	12	20		13.8		24
Nov	18	21	22	21	22		20.8		25
Dec	13	10	14	11	17		13		28

## Sheet: Figure 3 + Table 1
Date	Pod	Coordinates
2018-01-01	K	47 25.39 -122 31.41
2018-01-06	K	47 29.94 -122 25.15
2018-01-14	J	48 41.70 -123 14.97
2018-01-28	J	48 23.36 -123 22.42
2018-02-02	J	48 33.99 -123 00.56
2018-03-03	JK	48 20.21 -123 45.81
2018-03-04	JK	48 30.77 -123 10.41
2018-03-11	J	49 09.10 -123 38.50
2018-03-18	J	48 52.39 -123 15.26
2018-03-21	J	48 12.52 -123 25.54
2018-03-24	J	48 59.63 -123 35.41
2018-03-31	J	48 32.74 -123 11.12
2018-04-03	J	48 34.99 -123 12.38
2018-04-06	J	48 31.31 -123 09.74
2018-04-07	J	47 57.77 -122 19.69
2018-04-08	J	48 13.53 -122 34.86
2018-04-09	J	48 20.13 -123 22.81
2018-06-11	JL	48 29.30 -123 07.14
2018-06-11	L	48 28.59 -123 05.75
2018-06-12	J	48 43.79 -123 07.90
2018-06-12	L	48 19.82 -123 42.29
2018-06-12	L	48 43.34 -122 58.91
2018-06-13	L	48 41.61 -123 11.37
2018-06-14	J	48 35.82 -123 12.84
2018-06-15	J	48 30.69 -123 09.47
2018-06-16	JKL	48 19.33 -123 46.34
2018-06-19	JL	48 19.20 -123 43.94
2018-06-20	JL	48 20.07 -123 03.71
2018-06-21	J	48 44.53 -123 09.91
2018-06-21	L	48 41.10 -122 59.76
2018-06-27	JL	48 18.07 -123 39.27
2018-06-28	JL	48 45.64 -123 19.56
2018-06-29	JL	48 14.24 -123 26.22
2018-07-02	JK	48 18.19 -123 39.59
2018-07-12	JK	48 25.00 -123 13.46
2018-07-12	JK	48 25.07 -123 14.09
2018-07-13	J	48 41.33 -123 14.55
2018-07-13	K	48 41.85 -123 15.61
2018-07-13	K	48 41.94 -123 14.56
2018-07-13	K	48 32.63 -123 11.24
2018-07-14	JK	48 23.87 -123 20.97
2018-07-15	J	48 30.75 -123 09.98
2018-07-15	K	48 19.47 -123 45.19
2018-07-16	J	49 10.61 -123 18.08
2018-07-17	J	48 30.98 -123 09.30
2018-07-17	JK	48 30.43 -123 09.91
2018-07-18	J	48 29.39 -123 07.05
2018-07-18	J	48 29.07 -123 07.39
2018-07-19	J	48 17.97 -123 34.70
2018-07-19	J	48 47.49 -123 01.35
2018-07-20	J	48 45.69 -123 05.43
2018-07-20	J	49 02.14 -123 15.20
2018-07-21	J	48 30.73 -123 10.00
2018-07-21	J	48 18.32 -123 45.96
2018-07-22	J	48 51.47 -123 19.45
2018-07-23	J	48 32.31 -123 11.28
2018-07-24	J	48 22.64 -123 26.69
2018-07-24	JK	48 27.22 -123 02.42
2018-07-24	JK	48 27.37 -123 01.90
2018-07-24	L	48 19.53 -123 42.24
2018-07-25	JK	48 27.18 -123 02.89
2018-07-25	JK	48 25.19 -122 41.95
2018-07-25	K	48 33.78 -122 44.73
2018-07-26	JK	48 29.81 -122 46.62
2018-07-27	J	48 26.75 -123 00.31
2018-07-28	J	48 40.98 -123 14.99
2018-07-29	J	48 28.39 -123 04.77
2018-07-29	J	48 45.18 -123 06.39
2018-07-30	J	49 10.69 -123 22.22
2018-07-31	JL	48 22.56 -123 03.82
2018-07-31	L	48 22.56 -123 03.82
2018-08-01	JL	49 06.74 -123 17.39
2018-08-01	L	48 18.83 -123 40.90
2018-08-02	JL	48 14.99 -123 35.68
2018-08-10	J	48 50.83 -123 20.97
2018-08-11	J	48 27.34 -123 02.22
2018-08-12	J	48 29.38 -123 07.22
2018-08-13	J	48 19.86 -123 45.45
2018-08-18	J	48 20.92 -123 49.00
2018-08-19	J	48 20.33 -123 49.77
2018-08-31	J	48 18.44 -123 34.33
2018-09-01	J	48 46.61 -123 19.28
2018-09-02	J	48 41.31 -123 14.34
2018-09-02	L	48 18.15 -123 32.04
2018-09-03	JL	48 29.81 -123 07.98
2018-09-04	J	49 06.90 -123 18.55
2018-09-04	L	49 02.69 -123 15.69
2018-09-05	JL	49 46.82 -124 45.86
2018-09-05	L	48 42.16 -122 59.06
2018-09-06	JL	49 07.65 -123 25.40
2018-09-07	JL	48 19.19 -122 54.61
2018-09-08	JL	49 15.71 -123 34.34
2018-09-09	JL	48 32.60 -123 10.39
2018-09-10	JL	48 49.64 -123 19.67
2018-09-11	JL	49 10.77 -123 22.00
2018-09-12	JL	48 48.45 -122 57.08
2018-09-13	JKL	48 18.04 -123 39.25
2018-09-14	JKL	48 51.62 -123 18.60
2018-09-15	JKL	49 03.55 -123 18.41
2018-09-16	J	47 55.53 -122 29.07
2018-09-16	KL	48 25.24 -122 58.79
2018-09-17	J	48 27.16 -123 02.79
2018-09-17	KL	49 19.88 -123 28.21
2018-09-18	JKL	48 51.92 -122 57.46
2018-09-19	JKL	48 14.80 -123 11.89
2018-09-20	J	48 37.46 -123 12.53
2018-09-20	KL	48 27.45 -123 02.13
2018-09-21	KL	48 19.76 -123 45.06
2018-09-22	J	49 20.87 -123 54.41
2018-09-23	J	48 35.30 -122 45.43
2018-09-24	J	48 26.10 -123 02.66
2018-09-25	J	48 27.44 -123 02.91
2018-09-26	J	48 01.78 -122 37.58
2018-09-27	J	48 59.81 -123 18.25
2018-09-28	J	48 14.24 -123 32.53
2018-09-30	JKL	48 16.08 -123 45.54
2018-10-02	J	48 18.29 -123 39.15
2018-10-03	J	48 26.22 -123 00.37
2018-10-07	J	48 50.54 -123 12.35
2018-10-08	J	48 17.32 -123 29.56
2018-10-16	JK	48 16.43 -123 31.86
2018-10-20	JK	48 19.56 -123 43.79
2018-10-25	J	48 19.68 -123 42.31
2018-11-04	J	47 49.64 -122 24.82
2018-11-05	J	47 48.30 -122 25.79
2018-11-06	J	47 50.72 -122 24.74
2018-11-07	J	47 45.60 -122 25.03
2018-11-08	J	47 27.46 -122 24.96
2018-11-09	J	47 57.81 -122 19.48
2018-11-10	J	47 48.89 -122 25.68
2018-11-11	J	47 49.98 -122 24.75
2018-11-12	J	47 49.12 -122 27.82
2018-11-12	K	48 14.76 -123 03.24
2018-11-13	JK	47 44.85 -122 27.31
2018-11-14	JK	47 25.28 -122 31.65
2018-11-15	JK	47 31.26 -122 25.28
2018-11-16	JK	47 36.08 -122 27.18
2018-11-17	J	47 48.44 -122 25.74
2018-11-17	K	48 17.78 -123 21.15
2018-11-18	J	48 06.54 -122 39.61
2018-11-19	J	48 15.94 -123 22.90
2018-11-20	JK	48 14.20 -123 37.81
2018-11-30	K	47 18.31 -122 28.49
2018-12-01	K	47 27.45 -122 25.21
2018-12-01	L	48 14.73 -123 23.61
2018-12-02	KL	48 30.17 -123 10.64
2018-12-03	KL	48 31.84 -122 45.31
2018-12-05	J	47 19.40 -122 31.04
2018-12-06	J	47 46.05 -122 26.76
2018-12-07	J	47 48.36 -122 27.76
2018-12-08	J	48 16.44 -123 31.65
2018-12-13	J	47 19.30 -122 29.81
2018-12-14	J	47 58.78 -122 19.70
2018-12-15	JK	47 48.89 -122 25.79
2018-12-18	JK	47 48.89 -122 25.79
2018-12-26	KL	48 23.37 -123 25.01
2018-12-31	J	48 23.61 -123 15.33
2019-01-03	Unk	48 30.23 -123 09.51
2019-01-10	J	48 18.34 -123 27.32
2019-01-10	K	47 39.74 -122 26.96
2019-01-10	L	47 27.07 -122 24.17
2019-01-11	J	48 29.84 -123 09.95
2019-01-11	KL	48 20.68 -123 18.30
2019-01-12	J	48 47.49 -123 01.41
2019-01-12	K	48 48.00 -123 19.78
2019-01-14	J	48 30.51 -122 57.79
2019-01-18	J	47 37.26 -122 25.73
2019-01-19	J	47 48.83 -122 27.48
2019-01-19	K	47 49.49 -122 27.96
2019-01-20	J	47 58.42 -122 20.54
2019-01-21	J	47 58.71 -122 19.34
2019-01-29	Unk	48 46.89 -123 20.35
2019-01-30	L	48 32.84 -123 13.79
2019-02-05	J	48 30.89 -123 09.73
2019-02-18	J	48 51.73 -123 03.38
2019-02-23	J	48 31.62 -123 11.48
2019-02-27	L	48 30.48 -122 43.20
2019-03-10	J	49 52.32 -125 00.61
2019-03-14	J	49 18.97 -123 18.00
2019-03-19	J	49 01.87 -123 30.40
2019-03-22	J	48 38.60 -123 14.99
2019-03-23	J	48 31.11 -123 10.08
2019-03-26	J	48 45.40 -123 04.92
2019-03-30	J	48 29.96 -123 09.82
2019-03-31	J	48 50.84 -123 03.15
2019-04-01	J	48 44.46 -123 02.99
2019-04-02	J	49 00.28 -123 09.89
2019-04-07	J	47 42.92 -122 24.52
2019-04-08	J	48 29.07 -123 07.51
2019-04-12	J	49 54.67 -125 05.26
2019-04-17	J	49 14.98 -123 34.16
2019-04-20	J	48 49.23 -123 11.02
2019-04-21	J	48 43.77 -122 47.90
2019-04-28	J	48 54.72 -123 10.73
2019-04-29	J	49 04.16 -123 16.00
2019-04-30	J	49 09.09 -123 18.32
2019-05-01	J	48 42.33 -122 49.32
2019-05-02	J	48 46.33 -123 19.13
2019-05-04	J	49 55.24 -125 05.72
2019-05-06	J	48 46.86 -122 44.54
2019-07-05	JK	48 27.46 -123 02.29
2019-07-06	JK	48 51.65 -123 20.51
2019-08-14	J	48 18.22 -123 37.23
2019-08-15	J	48 25.36 -123 00.25
2019-08-16	J	48 27.08 -123 02.84
2019-08-17	J	48 30.24 -123 09.98
2019-08-18	J	48 30.63 -123 09.11
2019-08-18	J	48 26.94 -123 00.57
2019-08-19	J	48 46.60 -123 02.26
2019-08-20	J	48 36.87 -123 03.50
2019-08-21	J	48 58.66 -123 10.72
2019-08-21	JKL	48 19.71 -123 47.13
2019-08-22	JKL	48 19.23 -123 43.46
2019-08-24	J	48 20.30 -123 45.23
2019-08-25	J	48 26.98 -123 02.60
2019-08-26	J	48 27.77 -123 03.42
2019-08-27	J	48 28.79 -123 05.69
2019-08-28	J	49 09.57 -123 18.31
2019-08-29	J	48 59.89 -123 10.11
2019-08-30	J	48 27.43 -123 02.09
2019-08-31	J	48 27.20 -123 02.25
2019-09-03	J	48 24.39 -123 23.73
2019-09-04	J	48 24.29 -122 43.04
2019-09-04	JK	48 19.07 -123 44.35
2019-09-05	JK	48 28.46 -123 04.70
2019-09-06	KL	48 20.69 -123 46.44
2019-09-09	J	48 29.25 -123 07.22
2019-09-10	J	48 30.69 -123 09.23
2019-09-17	JK	47 48.88 -122 26.83
2019-09-18	JK	47 52.84 -122 24.78
2019-09-19	JK	47 34.85 -122 27.11
2019-09-20	JK	47 31.45 -122 24.90
2019-09-21	JK	47 58.31 -122 20.01
2019-09-21	KL	48 29.35 -123 06.67
2019-09-21	L	48 29.35 -123 06.67
2019-09-22	JK	47 48.97 -122 27.50
2019-09-22	KL	48 15.84 -123 27.74
2019-09-22	L	49 05.25 -123 19.14
2019-09-23	JK	47 47.98 -122 25.80
2019-09-23	L	49 20.61 -123 30.24
2019-09-24	JK	47 27.94 -122 24.49
2019-09-24	KL	48 17.32 -123 31.68
2019-09-25	JK	47 36.52 -122 27.86
2019-09-25	KL	48 26.81 -123 02.39
2019-09-25	L	49 10.56 -123 17.71
2019-09-26	JK	48 34.48 -122 45.13
2019-09-28	JKL	49 58.52 -125 09.61
2019-09-29	JKL	49 54.16 -125 04.14
2019-09-30	JKL	48 47.63 -123 02.06
2019-10-03	J	48 17.60 -123 39.93
2019-10-06	J	48 17.94 -123 44.85
2019-10-07	J	48 20.50 -123 45.42
2019-10-09	J	48 19.36 -123 42.92
2019-10-11	J	48 01.64 -122 37.59
2019-10-12	J	47 36.98 -122 24.99
2019-10-13	J	47 41.20 -122 26.43
2019-10-14	J	47 56.79 -122 31.56
2019-10-15	J	47 31.76 -122 25.90
2019-10-15	L	48 16.93 -123 33.04
2019-10-16	J	47 58.35 -122 19.14
2019-10-17	J	47 56.83 -122 34.55
2019-10-18	JL	48 47.83 -123 20.07
2019-10-23	JL	49 47.21 -124 50.51
2019-10-24	JL	48 50.29 -123 11.05
2019-10-27	JL	49 12.04 -123 20.04
2019-10-28	JL	49 22.79 -123 46.29
2019-10-29	JL	48 41.25 -123 15.02
2019-11-01	JL	48 19.40 -123 22.11
2019-11-04	JKL	48 20.14 -123 23.86
2019-11-05	JK	48 17.61 -123 38.13
2019-11-05	L	48 30.92 -123 10.51
2019-11-07	J	48 16.47 -123 34.54
2019-11-08	J	47 37.05 -122 28.59
2019-11-09	J	47 31.55 -122 25.43
2019-11-10	J	47 47.48 -122 26.49
2019-11-11	J	47 49.51 -122 27.65
2019-11-12	J	47 33.54 -122 27.01
2019-11-13	J	47 48.69 -122 26.95
2019-11-13	J	48 17.68 -123 31.51
2019-11-14	J	47 52.55 -122 25.41
2019-11-15	J	48 18.43 -123 32.36
2019-11-16	J	48 30.06 -123 09.66
2019-11-21	J	48 58.43 -123 23.59
2019-11-22	J	48 22.75 -123 23.45
2019-11-23	J	48 08.48 -122 42.79
2019-11-24	J	47 47.24 -122 27.26
2019-11-25	J	47 31.33 -122 27.20
2019-11-26	J	47 33.46 -122 27.95
2019-11-26	KL	48 23.26 -123 24.69
2019-11-27	J	47 30.33 -122 24.97
2019-11-28	J	48 00.41 -122 37.64
2019-12-11	L	48 22.92 -123 26.38
2019-12-17	J	48 29.68 -123 07.72
2019-12-17	KL	48 23.24 -123 22.67
2019-12-18	JKL	48 03.21 -122 38.33
2019-12-19	JKL	47 49.65 -122 27.07
2019-12-20	JKL	48 20.15 -123 30.26
2019-12-22	J	48 30.59 -123 11.31
2019-12-23	J	47 53.62 -122 29.04
2019-12-24	J	47 57.31 -122 19.01
2019-12-24	KL	48 31.46 -123 10.15
2019-12-25	J	47 58.19 -122 18.81
2019-12-30	JK	48 51.52 -123 19.32
2020-01-04	K	48 52.55 -123 18.01
2020-01-08	J	49 12.72 -123 48.03
2020-01-19	J	48 16.29 -123 31.87
2020-01-21	JK	48 12.75 -123 31.75
2020-01-22	JK	48 01.85 -122 36.47
2020-01-23	JKL	47 28.07 -122 24.81
2020-01-24	JKL	47 38.09 -122 28.23
2020-01-24	L	48 30.92 -123 12.42
2020-01-25	JKL	48 10.95 -122 44.14
2020-02-19	JK	48 18.09 -123 34.24
2020-02-20	J	48 54.00 -123 12.00
2020-02-23	J	49 33.66 -124 37.95
2020-02-25	J	48 30.37 -123 09.65
2020-02-26	J	48 30.49 -123 09.12
2020-02-29	J	48 30.69 -123 10.52
2020-03-05	L	48 13.79 -123 43.94
2020-03-06	J	48 10.87 -123 42.20
2020-03-09	J	48 45.61 -123 05.84
2020-03-10	J	48 45.25 -123 17.96
2020-03-12	J	48 30.58 -123 12.11
2020-03-17	J	48 42.96 -122 52.92
2020-03-18	J	48 52.18 -123 15.22
2020-03-20	J	49 18.41 -124 06.74
2020-03-21	J	48 45.14 -122 58.29
2020-03-22	J	48 46.05 -122 50.33
2020-03-24	J	49 19.54 -123 25.45
2020-03-31	J	48 52.54 -123 18.32
2020-04-04	J	49 58.72 -125 09.26
2020-04-05	J	49 17.58 -124 04.14
2020-04-10	J	49 04.32 -123 25.40
2020-04-12	J	49 47.38 -124 59.49
2020-04-15	J	50 05.49 -125 10.40
2020-04-16	J	49 23.79 -124 07.47
2020-06-26	L	48 30.27 -123 09.22
2020-06-27	L	48 20.52 -123 46.21
2020-07-01	K	48 30.21 -123 08.75
2020-07-02	K	48 27.26 -123 02.46
2020-07-04	J	48 18.44 -123 38.34
2020-07-05	J	48 44.89 -123 00.81
2020-07-06	J	48 32.48 -123 10.70
2020-07-07	J	48 28.56 -123 05.77
2020-07-07	J	48 28.56 -123 05.77
2020-07-07	J	48 28.56 -123 05.77
2020-07-08	J	48 29.36 -123 07.59
2020-07-08	J	48 40.83 -123 15.16
2020-07-08	J	48 35.04 -122 45.62
2020-07-09	J	48 30.84 -123 10.10
2020-07-10	J	48 29.21 -123 06.73
2020-07-11	J	48 30.65 -123 09.20
2020-07-12	J	48 51.77 -123 18.60
2020-07-13	J	48 46.65 -123 19.56
2020-07-14	J	48 28.78 -123 07.02
2020-07-15	J	48 29.51 -123 07.39
2020-07-16	J	48 49.47 -123 20.50
2020-07-17	J	48 26.92 -123 02.19
2020-07-18	J	48 32.56 -123 10.67
2020-07-23	KL	50 15.82 -125 23.18
2020-07-24	KL	48 42.42 -123 07.08
2020-07-25	KL	48 22.82 -123 04.91
2020-07-26	KL	48 16.32 -123 30.93
2020-09-01	J	48 26.10 -123 00.17
2020-09-02	J	48 45.84 -123 18.31
2020-09-03	J	48 27.32 -123 02.53
2020-09-04	J	49 15.93 -123 20.01
2020-09-05	J	48 26.46 -123 02.07
2020-09-05	KL	48 19.80 -123 45.23
2020-09-05	L	48 17.28 -123 34.42
2020-09-11	JKL	48 19.57 -123 42.98
2020-09-12	JKL	49 05.48 -123 17.48
2020-09-13	KL	48 37.63 -123 08.22
2020-09-15	JKL	49 15.61 -123 31.06
2020-09-16	JKL	49 09.51 -123 30.98
2020-09-17	JK	49 55.30 -124 55.20
2020-09-18	JKL	49 12.94 -123 16.31
2020-09-19	JKL	48 24.63 -122 50.28
2020-09-20	JKL	49 07.78 -123 15.10
2020-09-21	J	49 32.04 -124 43.72
2020-09-22	JKL	49 07.68 -123 23.60
2020-09-24	JKL	48 19.60 -123 24.77
2020-09-26	JL	48 19.49 -123 49.70
2020-09-27	J	48 08.21 -122 44.40
2020-09-27	K	48 18.62 -123 47.26
2020-09-28	J	47 39.55 -122 27.66
2020-09-28	K	48 58.72 -123 08.88
2020-09-29	J	47 46.05 -122 25.33
2020-09-30	J	48 26.88 -123 02.44
2020-10-04	J	48 32.71 -123 10.51
2020-10-05	J	47 52.44 -122 25.80
2020-10-06	J	47 49.77 -122 26.87
2020-10-07	J	48 29.48 -123 07.70
2020-10-14	J	48 19.72 -123 43.05
2020-10-15	J	48 16.98 -123 42.78
2020-10-16	J	47 49.19 -122 27.92
2020-10-17	J	47 38.07 -122 26.44
2020-10-18	J	47 36.26 -122 27.12
2020-10-19	J	48 01.00 -122 38.02
2020-10-22	J	49 53.68 -124 59.53
2020-10-25	J	48 43.59 -123 08.51
2020-11-02	J	48 01.77 -122 37.92
2020-11-03	J	47 52.08 -122 23.79
2020-11-04	J	47 34.85 -122 27.25
2020-11-06	J	48 18.46 -123 26.63
2020-11-08	JK	48 17.35 -123 35.13
2020-11-09	JK	48 51.35 -123 18.50
2020-11-10	JK	48 55.05 -123 20.19
2020-11-11	JK	48 01.93 -122 37.85
2020-11-12	JK	47 39.73 -122 28.82
2020-11-12	L	48 17.58 -123 38.52
2020-11-13	JK	48 08.68 -122 43.51
2020-11-18	J	48 16.99 -123 29.29
2020-11-19	J	48 08.81 -122 43.36
2020-11-20	J	47 52.45 -122 25.36
2020-11-21	J	47 47.97 -122 27.63
2020-11-22	J	48 01.08 -122 37.06
2020-11-23	J	48 22.77 -123 24.33
2020-11-24	J	48 22.99 -123 13.07
2020-11-26	J	48 19.37 -123 44.00
2020-11-27	J	47 48.63 -122 27.59
2020-11-28	J	47 39.74 -122 27.14
2020-11-29	J	47 52.59 -122 28.93
2020-11-30	J	48 51.75 -123 18.82
2020-12-01	K	48 22.80 -123 20.70
2020-12-02	JK	49 29.23 -124 26.15
2020-12-04	JK	49 20.70 -124 16.52
2020-12-05	JK	48 50.95 -123 11.86
2020-12-06	JK	48 01.75 -122 38.22
2020-12-07	JK	47 52.59 -122 23.55
2020-12-08	JK	48 06.52 -122 28.79
2020-12-10	JK	48 29.77 -123 08.08
2020-12-11	JK	48 53.03 -123 14.99
2020-12-20	JK	47 43.13 -122 28.67
2020-12-21	JK	48 01.79 -122 37.13
2020-12-22	JK	48 20.81 -123 23.55
2020-12-23	JK	48 23.02 -123 23.70
2020-12-25	JK	49 19.17 -123 22.92
2021-01-06	JK	48 22.20 -123 24.40
2021-01-13	JK	49 44.82 -124 47.77
2021-01-13	L	48 32.44 -123 10.62
2021-01-18	JK	48 55.33 -123 12.52
2021-01-20	JK	48 39.20 -123 08.83
2021-02-04	JK	48 46.63 -123 02.31
2021-02-07	J	48 54.92 -123 13.26
2021-02-12	J	48 17.58 -123 31.90
2021-02-17	JKL	48 34.21 -123 13.04
2021-02-19	JKL	49 12.19 -123 50.20
2021-02-20	JK	48 35.67 -123 04.08
2021-02-20	L	48 30.22 -123 15.74
2021-03-06	J	48 27.75 -123 09.73
2021-03-08	J	48 54.93 -123 12.06
2021-03-09	J	48 33.59 -123 12.74
2021-03-09	J	48 41.18 -122 59.69
2021-03-10	J	48 34.31 -123 12.08
2021-03-12	J	48 30.10 -123 14.79
2021-03-16	J	48 52.91 -122 55.10
2021-03-22	J	48 27.51 -123 11.82
2021-03-23	J	49 24.55 -123 45.07
2021-03-24	J	48 32.58 -122 44.45
2021-03-24	J	48 54.95 -123 12.53
2021-03-26	J	49 09.72 -123 37.88
2021-03-27	J	48 32.01 -122 56.81
2021-03-28	J	48 34.96 -123 13.33
2021-03-31	J	49 16.84 -124 03.04
2021-04-02	J	49 13.92 -123 53.19
2021-04-03	J	48 32.63 -123 00.38
2021-04-05	J	49 33.24 -124 35.32
2021-04-06	J	48 56.02 -123 14.99
2021-04-07	J	48 49.99 -123 21.00
2021-04-09	J	49 29.89 -124 41.70
2021-04-10	J	48 40.64 -122 59.72
2021-07-01	K	48 39.26 -122 45.06
2021-07-28	JKL	48 18.13 -123 36.89
2021-08-25	L	48 29.67 -123 08.63
2021-08-28	L	49 03.80 -123 19.44
2021-08-30	L	48 46.73 -123 02.22
2021-09-01	J	48 30.58 -123 09.96
2021-09-01	L	49 00.64 -123 13.64
2021-09-02	J	49 00.71 -123 15.48
2021-09-02	L	48 18.17 -123 09.62
2021-09-03	J	49 11.19 -123 26.14
2021-09-03	L	48 17.62 -123 32.35
2021-09-04	J	49 01.98 -123 16.90
2021-09-05	J	49 01.95 -123 15.89
2021-09-06	J	48 30.84 -123 09.53
2021-09-07	J	48 03.92 -122 37.11
2021-09-08	J	48 07.88 -122 42.94
2021-09-09	J	48 51.82 -123 18.52
2021-09-09	KL	48 21.02 -123 45.72
2021-09-10	JKL	49 13.64 -123 21.26
2021-09-11	JKL	48 53.81 -123 18.97
2021-09-12	JKL	48 30.76 -123 09.46
2021-09-13	JKL	49 13.45 -123 21.37
2021-09-14	KL	48 46.31 -123 01.95
2021-09-15	J	48 29.68 -123 07.65
2021-09-15	K	48 29.68 -123 07.65
2021-09-15	L	48 29.68 -123 07.65
2021-09-16	J	48 52.53 -123 18.08
2021-09-16	KL	49 16.18 -123 20.22
2021-09-17	JK	48 30.43 -123 10.89
2021-09-18	J	48 29.54 -123 07.94
2021-09-18	L	48 46.77 -123 00.49
2021-09-19	JL	48 15.87 -122 56.06
2021-09-30	J	48 29.41 -123 07.34
2021-10-04	J	48 44.34 -123 08.41
2021-10-12	J	48 16.72 -123 41.83
2021-10-13	J	47 46.59 -122 25.78
2021-10-13	K	48 46.56 -123 19.53
2021-10-14	J	47 47.92 -122 28.01
2021-10-16	K	48 08.39 -122 42.88
2021-10-17	K	47 53.96 -122 25.72
2021-10-24	J	48 29.44 -123 08.38
2021-10-27	J	48 53.85 -123 18.60
2021-10-29	JKL	48 19.56 -123 27.76
2021-10-31	J	49 14.84 -123 56.92
2021-11-02	JL	48 20.27 -123 21.84
2021-11-04	K	48 18.84 -123 48.85
2021-11-04	L	48 17.81 -123 31.60
2021-11-05	JL	48 38.95 -123 02.28
2021-11-06	JL	47 47.34 -122 27.77
2021-11-07	JL	47 34.71 -122 27.12
2021-11-08	JL	47 46.02 -122 27.14
2021-11-09	JL	47 52.59 -122 25.41
2021-11-09	K	48 32.96 -123 12.78
2021-11-13	J	48 53.72 -123 17.26
2021-11-16	J	48 47.88 -123 01.05
2021-11-18	J	48 27.06 -123 07.90
2021-11-19	J	48 33.36 -123 13.52
2021-11-21	Unk	48 14.88 -123 28.44
2021-11-22	JK	47 49.61 -122 27.30
2021-11-23	J	47 32.57 -122 26.76
2021-11-24	J	47 58.64 -122 18.83
2021-11-25	J	47 30.75 -122 25.94
2021-11-26	J	48 01.77 -122 38.03
2021-11-27	J	47 54.20 -122 29.07
2021-11-28	Unk	48 17.72 -123 36.69
2021-11-29	J	48 29.66 -123 12.18
2021-11-30	J	48 53.07 -123 16.43
2021-12-01	JK	48 12.14 -122 46.80
2021-12-02	JK	47 20.00 -122 25.90
2021-12-03	J	47 51.16 -122 26.73
2021-12-03	K	47 37.09 -122 27.41
2021-12-12	J	48 31.74 -122 57.69
2021-12-13	J	48 01.78 -122 38.23
2021-12-14	J	47 27.84 -122 24.40
2021-12-15	J	47 35.57 -122 26.90
2021-12-16	J	48 09.63 -122 42.67
2021-12-20	J	48 57.44 -123 23.53
2021-12-27	L	48 23.76 -123 19.60
2021-12-30	L	48 19.73 -123 25.97
2022-01-01	J	48 47.30 -123 03.34
2022-01-02	J	47 37.16 -122 26.57
2022-01-03	J	47 28.05 -122 24.28
2022-01-09	J	48 44.50 -123 18.36
2022-01-12	J	48 36.99 -123 02.04
2022-01-13	J	48 42.74 -123 16.13
2022-01-18	J	48 07.78 -122 33.16
2022-01-20	JL	48 30.60 -123 11.60
2022-01-22	J	48 34.26 -123 01.33
2022-01-22	L	48 38.42 -123 13.72
2022-01-28	J	48 27.13 -123 02.75
2022-02-11	J	48 19.62 -123 42.58
2022-02-12	J	48 51.65 -123 19.60
2022-02-15	J	48 33.56 -123 00.03
2022-02-16	J	48 42.47 -123 13.48
2022-02-17	J	49 28.95 -124 26.64
2022-02-18	J	49 31.29 -124 43.38
2022-02-21	J	48 38.07 -122 52.64
2022-02-25	J	48 41.49 -123 15.71
2022-02-26	J	48 44.87 -123 17.16
2022-02-27	J	48 52.18 -122 55.24
2022-02-28	J	48 54.32 -123 03.56
2022-03-01	J	48 44.79 -123 03.70
2022-03-02	J	49 19.59 -123 26.16
2022-03-03	J	48 55.12 -123 13.18
2022-03-07	J	48 54.15 -123 12.58
2022-03-10	J	48 29.91 -123 09.23
2022-03-11	J	48 48.87 -123 34.50
2022-03-12	J	48 51.26 -123 34.55
2022-03-13	J	49 03.79 -123 35.70
2022-03-21	J	48 42.14 -123 12.09
2022-03-25	J	49 34.19 -124 35.60
2022-03-26	J	49 31.51 -124 32.51
2022-03-27	J	48 53.05 -123 16.10
2022-03-28	J	48 49.01 -123 20.15
2022-03-30	J	49 59.09 -125 09.83
2022-03-31	J	48 45.99 -123 00.52
2022-04-01	J	48 51.02 -123 04.15
2022-04-02	J	48 43.19 -122 52.52
2022-04-03	J	48 46.42 -123 00.05
2022-04-04	J	49 08.05 -123 48.97
2022-04-05	J	48 55.51 -123 21.40
2022-04-07	J	48 50.77 -123 12.38
2022-04-08	J	48 29.41 -123 07.54
2022-04-09	J	49 10.54 -123 39.87
2022-04-10	J	48 32.78 -122 59.34
2022-04-13	J	48 53.15 -123 17.62
2022-04-14	J	48 26.34 -123 15.77
2022-05-24	J	48 48.43 -123 20.84
2022-05-25	J	48 57.87 -123 33.86
2022-05-26	J	48 28.99 -123 07.82
2022-05-27	J	49 05.85 -123 25.57
2022-05-28	J	48 32.57 -123 11.92
2022-05-29	J	49 03.83 -123 21.14
2022-05-30	J	48 29.66 -123 08.49
2022-05-31	J	48 34.31 -123 11.89
2022-06-01	J	48 29.95 -123 08.77
2022-06-22	JL	48 27.12 -123 02.89
2022-06-23	J	48 31.72 -123 10.05
2022-06-23	L	48 29.10 -123 06.55
2022-06-24	J	48 45.02 -123 04.94
2022-06-24	L	48 27.38 -123 03.31
2022-06-25	J	48 34.97 -123 12.69
2022-06-25	L	48 34.97 -123 12.69
2022-06-26	J	48 45.74 -122 49.70
2022-06-26	L	48 24.34 -122 58.71
2022-06-27	J	48 49.98 -123 20.77
2022-06-27	L	48 23.61 -123 22.62
2022-06-28	J	48 45.99 -123 01.89
2022-07-09	JKL	48 19.78 -123 44.27
2022-07-10	JKL	48 30.54 -123 09.40
2022-07-11	JKL	48 47.53 -122 49.71
2022-07-12	JK	48 44.78 -123 17.36
2022-07-12	L	48 31.96 -123 11.02
2022-07-13	JK	48 17.76 -123 26.59
2022-07-22	J	48 29.02 -123 07.30
2022-07-23	J	48 52.88 -123 17.96
2022-07-24	J	48 31.24 -123 09.61
2022-07-25	J	48 45.59 -123 03.26
2022-07-26	J	48 43.32 -123 08.80
2022-07-27	J	48 42.89 -123 12.48
2022-07-28	J	48 29.25 -123 07.44
2022-07-28	L	48 19.66 -123 43.60
2022-07-29	J	48 55.83 -123 12.75
2022-07-29	L	48 24.89 -123 00.31
2022-07-30	JL	48 17.44 -123 44.44
2022-08-04	JL	48 28.03 -123 04.61
2022-08-05	J	48 47.50 -123 00.55
2022-08-06	J	49 00.43 -123 16.13
2022-08-06	L	48 35.42 -122 45.55
2022-08-06	L	48 27.77 -123 02.74
2022-08-07	J	48 30.43 -122 44.46
2022-08-07	L	48 29.76 -123 08.19
2022-08-08	J	48 45.77 -123 19.32
2022-08-08	L	48 27.29 -123 02.37
2022-08-09	J	48 55.44 -123 16.91
2022-08-14	JKL	48 15.73 -123 22.60
2022-09-01	J	48 18.43 -123 32.91
2022-09-02	J	48 46.08 -123 18.87
2022-09-03	J	48 56.37 -123 16.29
2022-09-04	J	48 29.18 -123 07.16
2022-09-05	J	48 52.66 -123 18.13
2022-09-06	J	48 23.79 -122 51.06
2022-09-07	J	48 25.66 -123 04.79
2022-09-08	JK	48 29.37 -123 07.57
2022-09-11	JL	48 19.50 -123 40.45
2022-09-18	J	48 19.10 -123 49.32
2022-09-19	J	48 19.72 -123 42.61
2022-09-27	J	48 19.17 -123 46.32
2022-09-28	J	48 27.03 -123 02.75
2022-09-30	J	49 13.01 -123 22.46
2022-10-01	J	49 47.92 -124 56.74
2022-10-03	J	48 46.34 -123 01.50
2022-10-04	J	47 41.19 -122 27.56
2022-10-05	J	47 48.52 -122 27.47
2022-10-06	J	48 27.52 -123 03.35
2022-10-07	J	47 56.68 -122 31.24
2022-10-08	J	47 44.90 -122 25.91
2022-10-09	J	47 55.56 -122 28.78
2022-10-10	J	48 45.71 -123 18.44
2022-10-11	J	49 50.05 -124 34.52
2022-10-12	J	49 59.71 -125 06.45
2022-10-13	J	49 17.59 -124 06.92
2022-10-14	J	48 32.59 -122 46.08
2022-10-15	J	47 34.68 -122 26.84
2022-10-16	J	47 46.67 -122 24.65
2022-10-26	J	48 27.57 -123 03.03
2022-10-27	J	47 52.40 -122 25.16
2022-10-28	J	47 49.03 -122 27.67
2022-10-29	J	47 51.07 -122 27.47
2022-10-30	J	47 52.63 -122 25.58
2022-11-06	JKL	48 19.71 -123 27.23
2022-11-07	JKL	47 37.30 -122 28.36
2022-11-08	JKL	47 39.46 -122 27.78
2022-11-09	JKL	47 46.14 -122 26.96
2022-11-10	JKL	47 35.90 -122 25.96
2022-11-11	JKL	48 30.28 -123 09.39
2022-11-12	JKL	48 29.66 -123 08.47
2022-11-13	JKL	49 38.31 -124 09.69
2022-11-14	JKL	49 59.50 -124 59.46
2022-11-15	JKL	48 53.40 -123 17.83
2022-11-16	JKL	49 17.10 -124 00.77
2022-11-17	JKL	50 02.13 -125 07.15
2022-11-18	J	48 54.09 -123 18.89
2022-11-18	KL	50 01.41 -125 05.72
2022-11-19	J	48 04.29 -122 38.42
2022-11-19	KL	49 16.11 -123 58.49
2022-11-20	J	47 52.39 -122 26.36
2022-11-20	KL	49 03.54 -123 25.18
2022-11-21	J	47 53.71 -122 29.23
2022-11-21	KL	49 02.41 -123 14.43
2022-11-22	J	48 04.92 -122 26.76
2022-11-22	K	48 08.64 -122 42.12
2022-11-22	L	48 08.64 -122 42.12
2022-11-23	J	47 48.16 -122 27.64
2022-11-23	K	47 21.22 -122 24.84
2022-11-24	JK	47 40.76 -122 26.67
2022-11-25	J	47 47.38 -122 25.99
2022-11-25	K	47 21.41 -122 23.71
2022-11-26	J	48 46.19 -123 19.43
2022-11-26	K	47 19.55 -122 31.50
2022-11-30	J	48 28.92 -122 44.85
2022-12-01	J	47 58.38 -122 19.60
2022-12-02	J	47 53.86 -122 28.75
2022-12-03	J	47 36.98 -122 28.35
2022-12-05	K	47 48.65 -122 26.59
2022-12-06	J	48 10.54 -122 45.56
2022-12-06	K	48 04.37 -122 37.57
2022-12-07	JK	47 47.89 -122 27.02
2022-12-08	J	47 58.77 -122 19.34
2022-12-08	K	47 34.49 -122 26.62
2022-12-09	JK	47 46.29 -122 26.85
2022-12-10	J	48 05.19 -122 38.95
2022-12-11	J	48 02.61 -122 21.43
2022-12-12	J	47 48.27 -122 27.16
2022-12-14	J	49 22.10 -123 26.53
2022-12-17	J	49 49.42 -124 54.91
2022-12-19	KL	48 27.96 -123 10.32
2022-12-21	JKL	49 31.76 -124 43.79
2022-12-24	KL	48 47.33 -123 03.26
2022-12-27	J	48 53.83 -123 17.31
